# Supplementary material for: The ARID1B spectrum in 143 patients: from nonsyndromic intellectual disability to Coffin–Siris syndrome
Source: PubMed Central journal article supplement (PMC6752273; doi:10.1038/s41436-018-0330-z), 2018-11-08

## **SUPPLEMENTARY MATERIAL**

### **The ARID1B spectrum in 143 patients: From non-syndromic intellectual disability to Coffin-Siris syndrome**

Eline (P.J.) van der Sluijs, Sandra Jansen, Samantha A. Vergano, Miho Adachi-Fukuda, Yasemin Alanay, Adila AlKindy, Anwar Baban, Allan Bayat, Stefanie Beck-Wödl, Katherine Berry, Emilia K. Bijlsma, Levinus A. Bok, Alwin F.J. Brouwer, Ineke van der Burgt, Philippe M. Campeau, Natalie Canham', Krystyna Chrzanowska, Yoyo W.Y. Chu, Brain H.Y. Chung, Karin Dahan, Marjan De Rademaeker, Anne Destree, Tracy Dudding-Byth, Rachel Earl, Nursel Elcioglu, Ellen R. Elias, Christina Fagerberg, Alice Gardham, Blanca Gener, Erica H. Gerkes, Ute Grasshoff, Arie van Haeringen, Karin R. Heitink, Johanna C. Herkert, Nicolette S. den Hollander, Denise Horn, David Hunt, Sarina G. Kant, Mitsuhiro Kato, Hülya Kayserili, Rogier Kersseboom, Esra Kilic, Malgorzata Krajewska-Walasek, Kylin Lammers, Lone W. Laulund, Damien Lederer, Melissa Lees, Vanesa López-González, Saskia Maas, Grazia M.S. Mancini, Carlo Marcelis, Francisco Martinez, Isabelle Maystadt, Marianne McGuire, Shane McKnee, Sarju Mehta, Kay Metcalfe, Jeff Milunsky, Seiji Mizuno, John B. Moeschler, Christian Netzer, Charlotte W. Ockeloen, Barbara Oehl-Jaschkowitz, Nobuhiko Okamoto, Sharon N.M. Olminkhof, Carmen Orellana, Laurent Pasquier, Caroline Pottinger, Vera Riehmer, Stephen P. Robertson, Maian Roifman', Caroline Rooryck, Fabienne G. Ropers, Monica Rosello, Claudia A.L. Ruivenkamp, Mahmut S. Sagiroglu, Suzanne C.E.H. Sallevelt, Amparo Sanchis Calvo, Pelin O. Simsek-Kiper, Gabriela Soares, Lucia Solaeche, Fatma Mujgan Sonmez, Miranda Splitt, Duco Steenbeek, Alexander P.A. Stegmann, Constance T.R.M. Stumpel, Saori Tanabe, Eyyup Uctepe, G. Eda Utine, Hermine E. Veenstra-Knol, Sunita Venkateswaran, Catheline Vilain', Catherine Vincent-Delorme, Anneke T. Vulto-van Silfhout, Patricia Wheeler, Golder N. Wilson, Louise C. Wilson, Bernd Wollnik, Tomoki Kosho, Dagmar Wieczorek, Evan Eichler, Rolph Pfundt, Bert B.A. de Vries, Jill Clayton-Smith, and Gijs W.E. Santen

## Contents

|             |      |
|-------------|------|
| - Table S1  | p. 3 |
| - Table S2  | p. 7 |
| - Table S3  | p.10 |
| - Table S4  | p.11 |
| - Table S5  | p.12 |
| - Table S6  | p.13 |
| - Figure S1 | p.14 |
| - Figure S2 | p.15 |
| - Figure S3 | p.16 |

**Table S1 Identified pathogenic variants in ARID1B**

| #   | Exon | cdnachange<br>(NM_020732.3(ARID1B):)     | Protein change    | Inheritance | Type of<br>mutation | gdna (Chr6(GRCh37):)     | Group      | Reference                |
|-----|------|------------------------------------------|-------------------|-------------|---------------------|--------------------------|------------|--------------------------|
| 75  | 1-20 | c.-2162464_*1205821del                   | p.0               | Unknown     | Deletion            | g.154936600_158734846del | ARID1B-CSS |                          |
| 137 | 1-20 | c.-441222_*437696del                     | p.0               | Unknown     | Deletion            | g.156657842_157966721del | ARID1B-ID  |                          |
| 20  | 1-20 | c.-392315_*2903306del                    | p.0               | De novo     | Deletion            | g.156706749_160432331del | ARID1B-CSS | (Tsurusaki et al., 2012) |
| 65  | 1-20 | c.-138625_*1360628del                    | p.0               | De novo     | Deletion            | g.156960439_158889653del | ARID1B-CSS | (Wieczorek et al., 2013) |
| 86  | 1-5  | c.-39637_2037+61693del                   | p.0               | Unknown     | Deletion            | g.157059427_157318403del | ARID1B-ID  |                          |
| 9   | 1-20 | c.(?_-1)_(*1_?)del                       | p.0               | Unknown     | Deletion            | -                        | ARID1B-CSS | (Santen et al., 2013)    |
| 104 | 1-20 | c.(?_-1)_(*1_?)del                       | p.0               | Unknown     | Deletion            | -                        | ARID1B-CSS |                          |
| 140 | 1    | c.850C>T                                 | p.Gln284*         | De novo     | Nonsense            | g.157099913C>T           | ARID1B-ID  |                          |
| 146 | 1    | c.1044_1065del                           | p.Gly351Metfs*11  | Unknown     | Frameshift          | g.157100107_157100128del | ARID1B-ID  |                          |
| 135 | 1    | c.1160_1200del                           | p.Ala387Glyfs*134 | De novo     | Frameshift          | g.157100223_157100263del | ARID1B-ID  |                          |
| 133 | 1    | c.1202del                                | p.Gly401Alafs*29  | De novo     | Frameshift          | g.157100265del           | ARID1B-ID  |                          |
| 7   | 1    | c.1222dup                                | p.Gln408Profs*127 | De novo     | Frameshift          | g.157100285dup           | ARID1B-CSS | (Santen et al., 2013)    |
| 39  | 1    | c.1235dup                                | p.Ser413Valfs*122 | De novo     | Frameshift          | g.157100298dup           | ARID1B-CSS | (Santen et al., 2013)    |
| 6   | 1    | c.1259dup                                | p.Asn420Lysfs*115 | De novo     | Frameshift          | g.157100322dup           | ARID1B-CSS | (Santen et al., 2013)    |
| 5   | 1    | c.1346del                                | p.Pro449Argfs*53  | De novo     | Frameshift          | g.157100409del           | ARID1B-CSS | (Santen et al., 2013)    |
| 68  | 1    | c.1389_1398del                           | p.Ala464Serfs*35  | De novo     | Frameshift          | g.157100452_157100461del | ARID1B-CSS | (Tsurusaki et al., 2014) |
| 82  | 1    | c.1389_1398del                           | p.Ala464Serfs*35  | De novo     | Frameshift          | g.157100452_157100461del | ARID1B-ID  |                          |
| 124 | 1    | c.1389_1398del                           | p.Ala464Serfs*35  | De novo     | Frameshift          | g.157100452_157100461del | ARID1B-CSS |                          |
| 21  | 1    | c.1392_1402del                           | p.Gln467Argfs*64  | De novo     | Frameshift          | g.157100455_157100465del | ARID1B-CSS | (Tsurusaki et al., 2014) |
| 50  | 1    | c.1540dupC                               | p.Gln514Profs*21  | De novo     | Frameshift          | g.157100603dup           | ARID1B-CSS | (Wieczorek et al., 2013) |
| 4   | 1    | c.1542+1G>A                              | r.spl             | De novo     | Splice site         | g.157100606G>A           | ARID1B-CSS | (Santen et al., 2013)    |
| 23  | 2-20 | c.1543-5717_*499944del                   | p.0               | De novo     | Deletion            | g.157144644_158028969del | ARID1B-ID  |                          |
| 127 | 2    | c.1579C>T                                | p.Gln527*         | De novo     | Nonsense            | g.157150397C>T           | ARID1B-ID  |                          |
| 76  | 2    | c.1612C>T                                | p.Gln538*         | De novo     | Nonsense            | g.157150430C>T           | ARID1B-CSS |                          |
| 97  | 2    | c.1618C>T                                | p.Gln540*         | De novo     | Nonsense            | g.157150436C>T           | ARID1B-ID  |                          |
| 14  | 2    | c.1678_1688del                           | p.Ile560Glyfs*89  | De novo     | Frameshift          | g.157150496_157150506del | ARID1B-CSS | (Tsurusaki et al., 2012) |
| 77  | 2    | c.1729C>T                                | p.Gln577*         | De novo     | Nonsense            | g.157150547C>T           | ARID1B-ID  |                          |
| 51  | 4    | c.1808dupG                               | p.Ser603Argfs*50  | De novo     | Frameshift          | g.157222541dup           | ARID1B-CSS | (Wieczorek et al., 2013) |
| 142 | 4    | c.1822C>T                                | p.Gln608*         | De novo     | Nonsense            | g.157222555C>T           | ARID1B-ID  |                          |
| 119 | 4    | c.1871del                                | p.Pro624Hisfs*44  | De novo     | Frameshift          | g.157222604del           | ARID1B-ID  | (Wieczorek et al., 2013) |
| 36  | 4    | c.1897C>T                                | p.Gln633*         | De novo     | Nonsense            | g.157222630C>T           | ARID1B-ID  |                          |
| 15  | 4    | c.1903C>T                                | p.Gln635*         | De novo     | Nonsense            | g.157222636C>T           | ARID1B-CSS | (Tsurusaki et al., 2012) |
| 95  | 5-8  | c.1927-13575_2552-1769del                | p.0               | De novo     | Deletion            | g.157243025_157467989del | ARID1B-CSS |                          |
| 143 | 5    | c.1960C>T                                | p.Gln654*         | Unknown     | Nonsense            | g.157256633C>T           | ARID1B-ID  |                          |
| 31  | 6-9  | c.(2037+1_2038-1)_<br>(2879+1_2880-1)del | p.0               | De novo     | Deletion            | -                        | ARID1B-CSS | (Santen et al., 2013)    |
| 101 | 6,7  | c.2038-144324_2407del                    | p.?               | De novo     | Deletion            | g.157261472_157454197del | ARID1B-ID  |                          |
| 85  | 6-10 | c.2038-144294_3025+3178del               | p.0               | De novo     | Deletion            | g.157261502_157491497del | ARID1B-ID  |                          |

|     |     |                                       |                   |         |             |                                 |            |                          |
|-----|-----|---------------------------------------|-------------------|---------|-------------|---------------------------------|------------|--------------------------|
| 131 | 6-8 | c.2038-125635_2551+6049del            | p.Asp680Valfs*63  | Unknown | Deletion    | g.157280161_157460390del        | ARID1B-ID  |                          |
| 144 | 6   | c.2038-100946_2281+309del             | p.0               | De novo | Deletion    | g.157304850_157406347del        | ARID1B-ID  |                          |
| 80  | 6,7 | c.2038-52488_2371+613del              | p.Asp680Valfs*54  | Unknown | Deletion    | g.157353308_157432308del        | ARID1B-ID  |                          |
| 89  | 6,7 | c.2038-52488_2371+613del              | p.Asp680Valfs*54  | Unknown | Deletion    | g.157353308_157432308del        | ARID1B-ID  |                          |
| 64  | 6-8 | c.2038-3756_2551+6201del              | p.Asp680Valfs*63  | De novo | Deletion    | g.157402040_157460542del        | ARID1B-CSS | (Wieczorek et al., 2013) |
| 71  | 6   | c.2062del                             | p.Leu688Serfs*9   | De novo | Frameshift  | g.157405820del                  | ARID1B-CSS | (Tsurusaki et al., 2014) |
| 98  | 6   | c.2200_2201delinsT                    | p.Gly734Serfs*11  | De novo | Frameshift  | g.157405958_157405959delinsT    | ARID1B-ID  |                          |
| 52  | 6   | c.2248C>T                             | p.Arg750*         | De novo | Nonsense    | g.157406006C>T                  | ARID1B-CSS | (Wieczorek et al., 2013) |
| 53  | 6   | c.2248C>T                             | p.Arg750*         | De novo | Nonsense    | g.157406006C>T                  | ARID1B-CSS | (Wieczorek et al., 2013) |
| 129 | 6   | c.2248C>T                             | p.Arg750*         | Unknown | Nonsense    | g.157406006C>T                  | ARID1B-CSS |                          |
| 84  | 7   | c.2318C>G                             | p.Ser773*         | De novo | Nonsense    | g.157431642C>G                  | ARID1B-ID  |                          |
| 139 | 8   | c.2385dup                             | p.Thr796Hisfs*35  | De novo | Frameshift  | g.157454175dup                  | ARID1B-ID  |                          |
| 88  | 8   | c.2519dup                             | p.Tyr840*         | De novo | Frameshift  | g.157454309dup                  | ARID1B-ID  |                          |
| 141 | 9   | c.2572_2573delinsCTGG                 | p.Ala858Leufs*57  | De novo | Frameshift  | g.157469778_157469779delinsCTGG | ARID1B-CSS |                          |
| 43  | 9   | c.2598del                             | p.Tyr867Thrfs*47  | Unknown | Frameshift  | g.157469804del                  | ARID1B-CSS | (Santen et al., 2013)    |
| 54  | 9   | c.2692C>T                             | p.Arg898*         | De novo | Nonsense    | g.157469898C>T                  | ARID1B-CSS | (Wieczorek et al., 2013) |
| 125 | 9   | c.2692C>T                             | p.Arg898*         | De novo | Nonsense    | g.157469898C>T                  | ARID1B-ID  |                          |
| 55  | 9   | c.2723delC                            | p.Pro908Hisfs*6   | De novo | Frameshift  | g.157469929del                  | ARID1B-CSS | (Wieczorek et al., 2013) |
| 32  | 9   | c.2803dup                             | p.Met935Asnfs*7   | Unknown | Frameshift  | g.157470009dup                  | ARID1B-CSS | (Santen et al., 2013)    |
| 44  | 9   | c.2877del                             | p.Ser959Argfs*9   | De novo | Frameshift  | g.157470083del                  | ARID1B-CSS | (Santen et al., 2013)    |
| 74  | 10  | c.2891_2892insAC                      | p.Phe964Leufs*5   | De novo | Frameshift  | g.157488185_157488186insAC      | ARID1B-CSS | (Tsurusaki et al., 2014) |
| 96  | 10  | c.2917dup                             | p.Met973Asnfs*16  | De novo | Frameshift  | g.157488211dup                  | ARID1B-ID  |                          |
| 128 | 10  | c.2917dup                             | p.Met973Asnfs*16  | Unknown | Frameshift  | g.157488211dup                  | ARID1B-ID  |                          |
| 41  | 10  | c.2998del                             | p.Ala1000Argfs*5  | De novo | Frameshift  | g.157488292del                  | ARID1B-CSS | (Santen et al., 2013)    |
| 47  | 10  | c.2998del                             | p.Ala1000Argfs*5  | De novo | Frameshift  | g.157488292del                  | ARID1B-CSS |                          |
| 78  | 11  | c.3041del                             | p.Ala1014Glufs*3  | De novo | Frameshift  | g.157495157del                  | ARID1B-ID  |                          |
| 24  | 11  | c.3135+1G>C                           | r.spl             | Unknown | Splice site | g.157495252G>C                  | ARID1B-CSS | (Santen et al., 2013)    |
| 100 | 12  | c.3136-2A>G                           | r.spl             | De novo | Splice site | g.157502101A>G                  | ARID1B-ID  |                          |
| 81  | 12  | c.3158del                             | p.Thr1053Metfs*77 | De novo | Frameshift  | g.157502125del                  | ARID1B-ID  |                          |
| 37  | 12  | c.3223C>T                             | p.Arg1075*        | De novo | Nonsense    | g.157502190C>T                  | ARID1B-CSS | (Santen et al., 2013)    |
| 126 | 12  | c.3223C>T                             | p.Arg1075*        | Unknown | Nonsense    | g.157502190C>T                  | ARID1B-ID  |                          |
| 12  | 12  | c.3304C>T                             | p.Arg1102*        | De novo | Nonsense    | g.157502271C>T                  | ARID1B-ID  |                          |
| 16  | 12  | c.3304C>T                             | p.Arg1102*        | De novo | Nonsense    | g.157502271C>T                  | ARID1B-CSS | (Tsurusaki et al., 2012) |
| 120 | 12  | c.3430C>T                             | p.Gln1144*        | Unknown | Nonsense    | g.157505449C>T                  | ARID1B-ID  | (Wieczorek et al., 2013) |
| 134 | 13  | c.(3345+1_3346-1)_<br>(3550+1_3551-1) | p.0               | Unknown | Deletion    | -                               | ARID1B-CSS |                          |
| 103 | 13  | c.3433_3434insTA                      | p.Tyr1145Leufs*67 | De novo | Frameshift  | g.157505452_157505453insTA      | ARID1B-ID  | (Sonmez et al., 2016)    |
| 114 | 13  | c.3473_3515del                        | p.Arg1158Profs*39 | De novo | Frameshift  | g.157505492_157505534del        | ARID1B-ID  |                          |
| 109 | 14  | c.3568C>T                             | p.Gln1190*        | De novo | Nonsense    | g.157510793C>T                  | ARID1B-CSS |                          |
| 19  | 14  | c.3586dup                             | p.Gln1196Profs*14 | De novo | Frameshift  | g.157510811dup                  | ARID1B-ID  |                          |
| 121 | 14  | c.3586dup                             | p.Gln1196Profs*14 | De novo | Frameshift  | g.157510811dup                  | ARID1B-ID  | (Wieczorek et al., 2013) |

|     |    |                    |                   |         |             |                              |            |                          |
|-----|----|--------------------|-------------------|---------|-------------|------------------------------|------------|--------------------------|
| 94  | 14 | c.3656dup          | p.His1220Serfs*26 | De novo | Frameshift  | g.157510881dup               | ARID1B-CSS |                          |
| 1   | 15 | c.3846dup          | p.Gly1283Trpfs*38 | De novo | Frameshift  | g.157511328dup               | ARID1B-CSS | (Santen et al., 2013)    |
| 25  | 16 | c.4009C>T          | p.Arg1337*        | De novo | Nonsense    | g.157517445C>T               | ARID1B-CSS | (Santen et al., 2013)    |
| 73  | 16 | c.4009C>T          | p.Arg1337*        | Unknown | Nonsense    | g.157517445C>T               | ARID1B-CSS | (Tsurusaki et al., 2014) |
| 145 | 16 | c.4009C>T          | p.Arg1337*        | De novo | Nonsense    | g.157517445C>T               | ARID1B-ID  |                          |
| 3   | 17 | c.4098C>G          | p.Tyr1366*        | De novo | Nonsense    | g.157520029C>G               | ARID1B-CSS | (Baban et al., 2008)     |
| 87  | 17 | c.4110G>A          | r.spl             | De novo | Splice site | g.157520041G>A               | ARID1B-CSS |                          |
| 147 | 17 | c.4110+1G>A        | r.spl             | De novo | Splice site | g.157520042G>A               | ARID1B-ID  |                          |
| 56  | 18 | c.4216_4217ins19   | p.Gln1406Leufs*59 | De novo | Frameshift  | g.157521944_157521945ins19   | ARID1B-CSS | (Wieczorek et al., 2013) |
| 116 | 18 | c.4304dup          | p.Gln1437Alafs*22 | Unknown | Frameshift  | g.157522032dup               | ARID1B-CSS |                          |
| 34  | 18 | c.4448_4449ins14   | p.Pro1489Leufs*10 | Unknown | Frameshift  | g.157522176_157522177ins14   | ARID1B-CSS | (Santen et al., 2013)    |
| 66  | 18 | c.4456C>T          | p.Gln1486*        | De novo | Nonsense    | g.157522184C>T               | ARID1B-ID  |                          |
| 118 | 18 | c.4566T>A          | p.Tyr1522*        | De novo | Nonsense    | g.157522294T>A               | ARID1B-ID  |                          |
| 40  | 18 | c.4620C>A          | p.Tyr1540*        | De novo | Nonsense    | g.157522348C>A               | ARID1B-CSS | (Santen et al., 2013)    |
| 49  | 18 | c.4622_4631del     | p.Gln1541Argfs*35 | De novo | Frameshift  | g.157522350_157522359del     | ARID1B-CSS | (Santen et al., 2013)    |
| 117 | 18 | c.4678C>T          | p.Gln1560*        | Unknown | Nonsense    | g.157522406C>T               | ARID1B-ID  |                          |
| 35  | 18 | c.4741C>T          | p.Gln1581*        | De novo | Nonsense    | g.157522469C>T               | ARID1B-ID  |                          |
| 93  | 18 | c.4741C>T          | p.Gln1581*        | De novo | Nonsense    | g.157522469C>T               | ARID1B-CSS |                          |
| 57  | 18 | c.4770_4771delinsG | p.Gln1591Argfs*23 | De novo | Frameshift  | g.157522498_157522499delinsG | ARID1B-CSS | (Wieczorek et al., 2013) |
| 13  | 18 | c.4771C>T          | p.Gln1591*        | De novo | Nonsense    | g.157522499C>T               | ARID1B-CSS |                          |
| 72  | 18 | c.4821del          | p.Pro1609Leufs*5  | De novo | Frameshift  | g.157522549del               | ARID1B-CSS | (Tsurusaki et al., 2014) |
| 30  | 18 | c.4847C>G          | p.Ser1616*        | De novo | Nonsense    | g.157522575C>G               | ARID1B-CSS |                          |
| 99  | 18 | c.4870C>T          | p.Arg1624*        | De novo | Nonsense    | g.157522598C>T               | ARID1B-ID  |                          |
| 106 | 18 | c.4870C>T          | p.Arg1624*        | De novo | Nonsense    | g.157522598C>T               | ARID1B-ID  |                          |
| 2   | 19 | c.4911_4915del     | p.Trp1637Cysfs*6  | De novo | Frameshift  | g.157525016_157525020del     | ARID1B-CSS | (Santen et al., 2013)    |
| 8   | 19 | c.4924_4930del     | p.Ser1642Asnfs*40 | De novo | Frameshift  | g.157525029_157525035del     | ARID1B-ID  |                          |
| 123 | 19 | c.5025G>A          | r.spl             | De novo | Splice site | g.157525130G>A               | ARID1B-ID  |                          |
| 29  | 20 | c.5025+1G>A        | r.spl             | Unknown | Splice site | g.157525131G>A               | ARID1B-CSS |                          |
| 58  | 20 | c.5071delC         | p.Leu1691*        | Unknown | Frameshift  | g.157527346del               | ARID1B-CSS | (Wieczorek et al., 2013) |
| 130 | 20 | c.5072del          | p.Leu1691Argfs*75 | De novo | Frameshift  | g.157527347del               | ARID1B-ID  |                          |
| 46  | 20 | c.5109_5114delinsT | p.Gly1704Profs*7  | De novo | Frameshift  | g.157527384_157527389delinsT | ARID1B-ID  |                          |
| 28  | 20 | c.5257G>T          | p.Glu1753*        | De novo | Nonsense    | g.157527532G>T               | ARID1B-CSS |                          |
| 91  | 20 | c.5267_5270del     | p.Glu1756Alafs*9  | De novo | Frameshift  | g.157527542_157527545del     | ARID1B-CSS |                          |
| 113 | 20 | c.5267_5270del     | p.Glu1756fs*9     | De novo | Frameshift  | g.157527542_157527545del     | ARID1B-ID  |                          |
| 48  | 20 | c.5329A>T          | p.Lys1777*        | De novo | Nonsense    | g.157527604A>T               | ARID1B-CSS | (Santen et al., 2013)    |
| 18  | 20 | c.5394_5397del     | p.Phe1798Leufs*52 | De novo | Frameshift  | g.157527669_157527672del     | ARID1B-ID  |                          |
| 42  | 20 | c.5394_5397del     | p.Phe1798Leufs*52 | De novo | Frameshift  | g.157527669_157527672del     | ARID1B-CSS | (Santen et al., 2013)    |
| 90  | 20 | c.5404C>T          | p.Arg1802*        | De novo | Nonsense    | g.157527679C>T               | ARID1B-ID  |                          |
| 138 | 20 | c.5404C>T          | p.Arg1802*        | De novo | Nonsense    | g.157527679C>T               | ARID1B-ID  |                          |
| 59  | 20 | c.5457G>A          | p.Trp1819*        | Unknown | Nonsense    | g.157527732G>A               | ARID1B-CSS | (Wieczorek et al., 2013) |
| 38  | 20 | c.5571_5572del     | p.Glu1858Alafs*8  | De novo | Frameshift  | g.157527848_157527849del     | ARID1B-ID  |                          |
| 92  | 20 | c.5594_5595del     | p.Ser1865*        | De novo | Frameshift  | g.157527869_157527870del     | ARID1B-ID  |                          |

|     |    |                               |                   |         |            |                                         |            |                          |
|-----|----|-------------------------------|-------------------|---------|------------|-----------------------------------------|------------|--------------------------|
| 67  | 20 | c.5623_5625delins<br>TGACGTCT | p.Ala1875*        | Unknown | Frameshift | g.157527898_157527900delins<br>TGACGTCT | ARID1B-CSS |                          |
| 136 | 20 | c.5626dup                     | p.Thr1876Asnfs*4  | De novo | Frameshift | g.157527901dup                          | ARID1B-ID  |                          |
| 17  | 20 | c.5632del                     | p.Asp1878Metfs*96 | Unknown | Frameshift | g.157527907del                          | ARID1B-CSS | (Tsurusaki et al., 2012) |
| 11  | 20 | c.5635delG                    | p.Asp1879Thrfs*95 | De novo | Frameshift | g.157527910del                          | ARID1B-CSS | (Santen et al., 2013)    |
| 26  | 20 | c.5968C>T                     | p.Arg1990*        | Unknown | Nonsense   | g.157528243C>T                          | ARID1B-CSS | (Santen et al., 2013)    |
| 33  | 20 | c.5968C>T                     | p.Arg1990*        | Unknown | Nonsense   | g.157528243C>T                          | ARID1B-CSS | (Santen et al., 2013)    |
| 45  | 20 | c.5968C>T                     | p.Arg1990*        | De novo | Nonsense   | g.157528243C>T                          | ARID1B-CSS | (Santen et al., 2013)    |
| 112 | 20 | c.5995del                     | p.Glu1999Argfs*22 | De novo | Frameshift | g.157528270del                          | ARID1B-CSS |                          |
| 10  | 20 | c.6038G>A                     | p.Trp2013*        | De novo | Nonsense   | g.157528313G>A                          | ARID1B-CSS | (Santen et al., 2013)    |
| 60  | 20 | c.6041G>A                     | p.Trp2014*        | Unknown | Nonsense   | g.157528316G>A                          | ARID1B-CSS | (Wieczorek et al., 2013) |
| 61  | 20 | c.6041G>A                     | p.Trp2014*        | Unknown | Nonsense   | g.157528316G>A                          | ARID1B-CSS | (Wieczorek et al., 2013) |
| 69  | 20 | c.6120C>G                     | p.Tyr2040*        | Unknown | Nonsense   | g.157528395C>G                          | ARID1B-CSS | (Tsurusaki et al., 2014) |
| 83  | 20 | c.6198del                     | p.Pro2068Glnfs*31 | De novo | Frameshift | g.157528473del                          | ARID1B-ID  |                          |
| 27  | 20 | c.6233del                     | p.Pro2078Leufs*21 | De novo | Frameshift | g.157528508del                          | ARID1B-CSS | (Santen et al., 2013)    |
| 105 | 20 | c.6238A>T                     | p.Arg2080*        | De novo | Nonsense   | g.157528513A>T                          | ARID1B-ID  |                          |
| 110 | 20 | c.6250G>T                     | p.Glu2084*        | Unknown | Nonsense   | g.157528525G>T                          | ARID1B-ID  |                          |
| 115 | 20 | c.6347_6350del                | p.Val2116Glyfs*28 | De novo | Frameshift | g.157528622_157528625del                | ARID1B-CSS |                          |
| 22  | 20 | c.6382C>T                     | p.Arg2128*        | De novo | Nonsense   | g.157528657C>T                          | ARID1B-CSS | (Tsurusaki et al., 2014) |
| 62  | 20 | c.6382C>T                     | p.Arg2128*        | De novo | Nonsense   | g.157528657C>T                          | ARID1B-CSS | (Wieczorek et al., 2013) |
| 111 | 20 | c.6383del                     | p.Arg2128Glnfs*17 | De novo | Frameshift | g.157528658del                          | ARID1B-ID  |                          |
| 63  | 20 | c.6439dupA                    | p.Arg2147Lysfs*45 | De novo | Frameshift | g.157528714dup                          | ARID1B-CSS | (Wieczorek et al., 2013) |
| 79  | 20 | c.6490G>T                     | p.Glu2164*        | De novo | Nonsense   | g.157528765G>T                          | ARID1B-ID  |                          |
| 132 | 20 | c.6511C>T                     | p.Gln2171*        | Unknown | Nonsense   | g.157528786C>T                          | ARID1B-ID  |                          |
| 70  | 20 | c.6516C>G                     | p.Tyr2172*        | De novo | Nonsense   | g.157528791C>G                          | ARID1B-CSS | (Tsurusaki et al., 2014) |
| 108 | 20 | c.6644del                     | p.Phe2215Serfs*17 | De novo | Frameshift | g.157528919del                          | ARID1B-ID  |                          |

Used transcript: NM\_020732.3. All variants have been uploaded in the LOVD database: [www.lovd.nl/ARID1B](http://www.lovd.nl/ARID1B)

- Baban A, Moresco L, Divizia MT, et al. Pituitary hypoplasia and growth hormone deficiency in Coffin-Siris syndrome. *Am J Med Genet A*. 2008;146A(3): 384-388. doi:10.1002/ajmg.a.32111
- Santen, G. W., Aten, E., Vulto-van Silfhout, A. T., Pottinger, C., van Bon, B. W., van Minderhout, I. J., . . . van Belzen, M. J. (2013). Coffin-Siris syndrome and the BAF complex: genotype-phenotype study in 63 patients. *Hum Mutat*, 34(11), 1519-1528. doi:10.1002/humu.22394
- Sonmez, F. M., Uctepe, E., Gunduz, M., Gormez, Z., Erpolat, S., Oznur, M., . . . Gunduz, E. (2016). Coffin-Siris syndrome with cafe-au-lait spots, obesity and hyperinsulinism caused by a mutation in the ARID1B gene. *Intractable Rare Dis Res*, 5(3), 222-226. doi:10.5582/irdr.2014.01040
- Tsurusaki, Y., Okamoto, N., Ohashi, H., Kosho, T., Imai, Y., Hibi-Ko, Y., . . . Matsumoto, N. (2012). Mutations affecting components of the SWI/SNF complex cause Coffin-Siris syndrome. *Nat Genet*, 44(4), 376-378. doi:10.1038/ng.2219
- Tsurusaki, Y., Okamoto, N., Ohashi, H., Mizuno, S., Matsumoto, N., Makita, Y., . . . Matsumoto, N. (2014). Coffin-Siris syndrome is a SWI/SNF complex disorder. *Clin Genet*, 85(6), 548-554. doi:10.1111/cge.12225
- Wieczorek, D., Bogershausen, N., Beleggia, F., Steiner-Haldenstatt, S., Pohl, E., Li, Y., . . . Wollnik, B. (2013). A comprehensive molecular study on Coffin-Siris and Nicolaides-Baraitser syndromes identifies a broad molecular and clinical spectrum converging on altered chromatin remodeling. *Hum Mol Genet*, 22(25), 5121-5135. doi:10.1093/hmg/ddt366

**Table S2 Extended overview of clinical characteristics of ARID1B patients**

| Clinical features +                                                                              | n = 143     |       |        | ARID1B-CSS  |       |        | ARID1B-ID   |       |        | p-value | Test |
|--------------------------------------------------------------------------------------------------|-------------|-------|--------|-------------|-------|--------|-------------|-------|--------|---------|------|
|                                                                                                  | pt affected | %     | n = 79 | pt affected | %     | n = 64 | pt affected | %     |        |         |      |
| Sex (female)                                                                                     | 69          | 48.3% | 79     | 45          | 57.0% | 64     | 24          | 37.5% | 0.028  | *       |      |
| If the patient was not classified as CSS, does the patient retrospectively fit the CSS spectrum? | 59          | 91.5% | -      | -           | -     | 59     | 54          | 91.5% | -      | -       |      |
| <i>Growth parameters &amp; development</i>                                                       |             |       |        |             |       |        |             |       |        |         |      |
| Gestational age, weeks (mean; SD)                                                                | 133         | 39.0  | 2.1    | 75          | 39.1  | 2.0    | 58          | 38.9  | 2.4    | 0.879   | #    |
| Birthweight (<-2 SDS)                                                                            | 129         | 7     | 5.4%   | 74          | 5     | 6.8%   | 55          | 2     | 3.6%   | 0.506   | **   |
| Height at birth (<-2 SDS)                                                                        | 43          | 4     | 9.3%   | 27          | 3     | 11.1%  | 16          | 1     | 6.3%   | 0.660   | **   |
| OFC at birth (<-2 SDS)                                                                           | 51          | 2     | 3.9%   | 35          | 1     | 2.9%   | 16          | 1     | 6.3%   | 0.232   | **   |
| Age last measurements, years (n; median; min-max)                                                | 143         | 10    | 0-51   | 79          | 10    | 0-36   | 64          | 9     | 0.5-51 | 0.682   | #    |
| Weight (<-2 SDS)                                                                                 | 92          | 6     | 6.5%   | 46          | 4     | 8.7%   | 46          | 2     | 4.3%   | 0.571   | **   |
| Height (<-2 SDS)                                                                                 | 122         | 37    | 30.3%  | 70          | 26    | 37.1%  | 52          | 11    | 21.2%  | 0.177   | **   |
| OFC (<-2 SDS)                                                                                    | 105         | 3     | 2.9%   | 63          | 2     | 3.2%   | 42          | 1     | 2.4%   | 0.670   | **   |
| Motor skills gross, delayed                                                                      | 103         | 102   | 99.0%  | 46          | 45    | 97.8%  | 57          | 57    | 100.0% | 0.447   | **   |
| Motor skills fine, delayed                                                                       | 100         | 95    | 95.0%  | 44          | 43    | 97.7%  | 56          | 52    | 92.9%  | 0.381   | **   |
| Sitting, months (mean, SD)                                                                       | 87          | 13.9  | 8.30   | 42          | 13.1  | 4.46   | 45          | 14.6  | 10.7   | 0.884   | #    |
| Walking independently, months (mean, SD)                                                         | 117         | 28.2  | 10.5   | 65          | 28.1  | 8.4    | 52          | 28.4  | 12.7   | 0.238   | #    |
| First words, months (mean, SD)                                                                   | 84          | 40.6  | 23.6   | 42          | 40.6  | 20.1   | 42          | 40.7  | 26.9   | 0.673   | #    |
| Speech, delayed                                                                                  | 131         | 86    | 65.6%  | 75          | 51    | 68.0%  | 56          | 35    | 62.5%  | 0.106   | **   |
| No speech                                                                                        |             | 42    | 32.1%  |             | 23    | 30.7%  |             | 19    | 33.9%  |         |      |
| Obstructive sleep apnea++                                                                        | 71          | 6     | 8.5%   | 34          | 0     | 0.0%   | 37          | 6     | 16.2%  | 0.026   | **   |
| Laryngomalacia++                                                                                 | 91          | 18    | 19.8%  | 47          | 8     | 17.0%  | 44          | 10    | 22.7%  | 0.466   | *    |
| Feeding difficulties                                                                             | 121         | 84    | 69.4%  | 62          | 39    | 62.9%  | 59          | 45    | 76.3%  | 0.111   | *    |
| Start of feeding difficulties                                                                    | 71          |       |        | 34          |       |        | 37          |       |        | 0.345   | **   |
| Birth                                                                                            |             | 54    | 76.1%  |             | 26    | 76.5%  |             | 28    | 75.7%  |         |      |
| Before 6 months                                                                                  |             | 12    | 16.9%  |             | 7     | 20.6%  |             | 5     | 13.5%  |         |      |
| After 6 months                                                                                   |             | 5     | 7.0%   |             | 1     | 2.9%   |             | 4     | 10.8%  |         |      |
| Duration of feeding problems                                                                     | 58          |       |        | 23          |       |        | 35          |       |        | 0.639   | **   |
| Brief                                                                                            |             | 27    | 46.6%  |             | 9     | 39.1%  |             | 18    | 51.4%  |         |      |
| Several years                                                                                    |             | 4     | 6.9%   |             | 2     | 8.7%   |             | 2     | 5.7%   |         |      |
| Ongoing                                                                                          |             | 27    | 46.6%  |             | 12    | 52.2%  |             | 15    | 42.9%  |         |      |
| Tube feeding                                                                                     | 65          | 11    | 16.9%  | 22          | 3     | 13.6%  | 43          | 8     | 18.6%  | 0.409   | **   |
| 0-6 months                                                                                       |             | 7     | 10.8%  |             | 1     | 4.5%   |             | 6     | 14.0%  |         |      |
| 6-12 months                                                                                      |             | 2     | 3.1%   |             | 1     | 4.5%   |             | 1     | 2.3%   |         |      |
| 1-3 years                                                                                        |             | 1     | 1.5%   |             | 0     | 0.0%   |             | 1     | 2.3%   |         |      |
| Recurrent infections                                                                             | 75          | 43    | 57.3%  | 30          | 19    | 63.3%  | 45          | 24    | 53.3%  | 0.391   | *    |
| Upper airway tract                                                                               |             | 13    | 17.3%  |             | 3     | 10.0%  |             | 10    | 22.2%  |         |      |
| Lower airway tract                                                                               |             | 2     | 2.7%   |             | 0     | 0.0%   |             | 2     | 4.4%   |         |      |
| ENT infections                                                                                   |             | 9     | 12.0%  |             | 3     | 10.0%  |             | 6     | 13.3%  |         |      |
| Otitis media                                                                                     |             | 11    | 14.7%  |             | 4     | 13.3%  |             | 7     | 15.6%  |         |      |
| Urinary tract                                                                                    |             | 2     | 2.7%   |             | 1     | 3.3%   |             | 1     | 2.2%   |         |      |
| <i>Neurological features</i>                                                                     |             |       |        |             |       |        |             |       |        |         |      |
| IQ (median; min-max)                                                                             | 35          | 55.0  | 26-114 | 17          | 48.0  | 26-114 | 18          | 57.0  | 29-109 | 0.067   | #    |
| Intellectual disability                                                                          | 127         | 126   | 99.2%  | 70          | 69    | 98.6%  | 57          | 57    | 100.0% | 0.015   | **   |
| Normal-mild                                                                                      |             | 4     | 3.1%   |             | 1     | 1.4%   |             | 3     | 5.3%   |         |      |
| Mild                                                                                             |             | 36    | 28.3%  |             | 27    | 38.6%  |             | 9     | 15.8%  |         |      |
| Mild-moderate                                                                                    |             | 20    | 15.7%  |             | 6     | 8.6%   |             | 14    | 24.6%  |         |      |
| Moderate                                                                                         |             | 28    | 22.0%  |             | 16    | 22.9%  |             | 12    | 21.1%  |         |      |
| Moderate-severe                                                                                  |             | 21    | 16.5%  |             | 12    | 17.1%  |             | 9     | 15.8%  |         |      |
| Severe                                                                                           |             | 17    | 13.4%  |             | 7     | 10.0%  |             | 10    | 17.5%  |         |      |
| Hypotonia                                                                                        | 116         | 94    | 81.0%  | 71          | 57    | 80.3%  | 45          | 37    | 82.2%  | 0.795   | *    |
| Seizures                                                                                         | 142         | 39    | 27.5%  | 78          | 22    | 28.2%  | 64          | 17    | 26.6%  | 0.880   | **   |
| No seizures, but abnormal EEG                                                                    |             | 8     | 5.6%   |             | 5     | 6.4%   |             | 3     | 4.7%   |         |      |
| Seizure start year (median, SD)                                                                  | 37          | 4.0   | 4.0    | 21          | 5.0   | 3.3    | 16          | 2.5   | 4.8    | 0.644   | #    |
| Seizure types                                                                                    | 23          |       |        | 10          |       |        | 13          |       |        | 0.953   | *    |
| Absence seizures (petit mal seizures)                                                            |             | 2     | 8.7%   |             | 1     | 10.0%  |             | 1     | 7.7%   |         |      |
| Myoclonic seizures                                                                               |             | 2     | 8.7%   |             | 1     | 10.0%  |             | 1     | 7.7%   |         |      |
| Tonic seizures                                                                                   |             | 2     | 8.7%   |             | 1     | 10.0%  |             | 1     | 7.7%   |         |      |
| Tonic-clonic seizures                                                                            |             | 11    | 47.8%  |             | 4     | 40.0%  |             | 7     | 53.8%  |         |      |
| Atonic seizures                                                                                  |             | 1     | 4.3%   |             | 1     | 10.0%  |             | 0     | 0.0%   |         |      |
| Focal seizures                                                                                   |             | 2     | 8.7%   |             | 1     | 10.0%  |             | 1     | 7.7%   |         |      |
| Febrile seizures                                                                                 | 93          | 3     | 3.2%   | 53          | 2     | 3.8%   | 40          | 1     | 2.5%   | 1.000   | **   |
| Seizure frequency                                                                                | 18          |       |        | 9           |       |        | 9           |       |        | 0.671   | **   |
| Once                                                                                             |             | 5     | 27.8%  |             | 1     | 11.1%  |             | 4     | 44.4%  |         |      |
| Less than once a year                                                                            |             | 2     | 11.1%  |             | 2     | 22.2%  |             | 0     | 0.0%   |         |      |
| Once a year                                                                                      |             | 6     | 33.3%  |             | 4     | 44.4%  |             | 2     | 22.2%  |         |      |
| Once a month                                                                                     |             | 2     | 11.1%  |             | 1     | 11.1%  |             | 1     | 11.1%  |         |      |
| 1/2 a month                                                                                      |             | 1     | 5.6%   |             | 0     | 0.0%   |             | 1     | 11.1%  |         |      |
| ≥ 2 per month                                                                                    |             | 1     | 5.6%   |             | 0     | 0.0%   |             | 1     | 11.1%  |         |      |
| Agenesis of the corpus callosum                                                                  | 101         | 29    | 28.7%  | 62          | 18    | 29.0%  | 39          | 11    | 28.2%  | 0.344   | **   |
| Partial/hypoplasia                                                                               |             | 14    | 13.9%  |             | 11    | 17.7%  |             | 3     | 7.7%   |         |      |
| Neuroradiology                                                                                   | 47          | 41    | 87.2%  | 17          | 16    | 94.1%  | 30          | 25    | 83.3%  | 0.305   | *    |
| Delayed myelination                                                                              |             | 8     | 17.0%  |             | 2     | 11.8%  |             | 6     | 20.0%  |         |      |
| Mega cisterna magna                                                                              |             | 7     | 14.9%  |             | 4     | 23.5%  |             | 3     | 10.0%  |         |      |
| Colpocephaly                                                                                     |             | 5     | 10.6%  |             | 2     | 11.8%  |             | 3     | 10.0%  |         |      |
| Hypoplastic splenium                                                                             |             | 1     | 2.1%   |             | 0     | 0.0%   |             | 1     | 3.3%   |         |      |
| Hypoplasia                                                                                       |             | 2     | 4.3%   |             | 0     | 0.0%   |             | 2     | 6.7%   |         |      |
| Hyperintense focal lesions                                                                       |             | 1     | 2.1%   |             | 0     | 0.0%   |             | 1     | 3.3%   |         |      |
| Enlarged Virchow-Robin spaces                                                                    |             | 2     | 4.3%   |             | 1     | 5.9%   |             | 1     | 3.3%   |         |      |
| Pachygyria                                                                                       |             | 1     | 2.1%   |             | 1     | 5.9%   |             | 0     | 0.0%   |         |      |
| Hippocampal malrotation                                                                          |             | 1     | 2.1%   |             | 1     | 5.9%   |             | 0     | 0.0%   |         |      |
| Interhemispheric cyst                                                                            |             | 1     | 2.1%   |             | 1     | 5.9%   |             | 0     | 0.0%   |         |      |
| <i>Vision and hearing impairments</i>                                                            |             |       |        |             |       |        |             |       |        |         |      |
| Vision impaired                                                                                  | 109         | 53    | 48.6%  | 62          | 28    | 45.2%  | 47          | 25    | 53.2%  | 0.406   | *    |
| Vision problems                                                                                  | 68          | 48    | 70.6%  | 33          | 26    | 78.8%  | 35          | 22    | 62.9%  | 0.320   | **   |

|                                             |                                    |     |       |       |    |       |        |    |       |       |          |
|---------------------------------------------|------------------------------------|-----|-------|-------|----|-------|--------|----|-------|-------|----------|
|                                             | Astigmatism                        | 11  | 16.2% |       | 8  | 24.2% |        | 3  | 8.6%  |       |          |
|                                             | Strabismus                         | 21  | 30.9% |       | 12 | 36.4% |        | 9  | 25.7% |       |          |
|                                             | Optic nerve hypoplasia             | 2   | 2.9%  |       | 2  | 6.1%  |        | 0  | 0.0%  |       |          |
|                                             | Nystagmus                          | 6   | 8.8%  |       | 2  | 6.1%  |        | 4  | 11.4% |       |          |
|                                             | Refraction error                   | 7   | 10.3% |       | 3  | 9.1%  |        | 4  | 11.4% |       |          |
| Myopia                                      |                                    | 102 | 28    | 27.5% | 59 | 11    | 18.6%  | 43 | 17    | 39.5% | 0.020 *  |
| Hypermetropia                               |                                    | 50  | 9     | 18.0% | 21 | 6     | 28.6%  | 29 | 3     | 10.3% | 0.140 ** |
| Abnormal eye exam                           |                                    | 40  | 7     | 17.5% | 15 | 1     | 6.7%   | 25 | 6     | 24.0% | 0.224 ** |
| Hearing loss                                |                                    | 122 | 27    | 22.1% | 71 | 13    | 18.3%  | 51 | 14    | 27.5% | 0.157 *  |
|                                             | Hearing loss, conductive           |     | 8     | 6.6%  |    | 1     | 1.4%   |    | 7     | 13.7% |          |
|                                             | Hearing loss, bilateral            |     | 14    | 11.5% |    | 6     | 8.5%   |    | 8     | 15.7% |          |
|                                             | Hearing loss, unilateral           |     | 6     | 4.9%  |    | 4     | 5.6%   |    | 2     | 3.9%  |          |
| Eartubes                                    |                                    | 122 | 6     | 4.9%  | 71 | 3     | 4.2%   | 51 | 3     | 5.9%  |          |
| Start hearing problems, congenital          |                                    | 11  | 7     | 63.6% | 3  | 2     | 66.7%  | 8  | 5     | 62.5% | 0.109 ** |
| Hearing aid                                 |                                    | 5   | 4     | 80.0% | 2  | 2     | 100.0% | 3  | 2     | 66.7% | 0.665 ** |
| <i>Dysmorphic features</i>                  |                                    |     |       |       |    |       |        |    |       |       |          |
| Coarse face                                 |                                    | 121 | 99    | 81.8% | 62 | 56    | 90.3%  | 59 | 43    | 72.9% | 0.013 *  |
| Hairline (low anterior and/or posterior)    |                                    | 91  | 63    | 69.2% | 45 | 34    | 75.6%  | 46 | 29    | 63.0% | 0.196 *  |
| Scalp hair, abnormal                        |                                    | 129 | 102   | 79.1% | 78 | 65    | 83.3%  | 51 | 37    | 72.5% | 0.141 *  |
|                                             | Sparse                             |     | 75    | 58.1% |    | 49    | 62.8%  |    | 26    | 51.0% |          |
| Forehead (broad or narrow)                  |                                    | 95  | 40    | 42.1% | 49 | 14    | 28.6%  | 46 | 26    | 56.5% | 0.000 ** |
|                                             | Broad                              |     | 21    | 22.1% |    | 3     | 6.1%   |    | 18    | 39.1% |          |
|                                             | Narrow                             |     | 19    | 20.0% |    | 11    | 22.4%  |    | 8     | 17.4% |          |
| Eyelashes, long                             |                                    | 131 | 83    | 63.4% | 79 | 60    | 75.9%  | 52 | 23    | 44.2% | 0.000 *  |
| Eyebrows, thick                             |                                    | 134 | 109   | 81.3% | 78 | 71    | 91.0%  | 56 | 38    | 67.9% | 0.001 *  |
| Ptosis                                      |                                    | 133 | 27    | 20.3% | 77 | 16    | 20.8%  | 56 | 11    | 19.6% | 0.872 *  |
| Tear duct non-functioning or absent         |                                    | 93  | 14    | 15.1% | 54 | 9     | 16.7%  | 39 | 5     | 12.8% | 0.609 *  |
| Nasal bridge, abnormal                      |                                    | 100 | 61    | 61.0% | 59 | 37    | 62.7%  | 41 | 24    | 58.5% | 0.050 *  |
|                                             | Wide                               |     | 34    | 34.0% |    | 24    | 40.7%  |    | 10    | 24.4% |          |
|                                             | Flat                               |     | 21    | 21.0% |    | 12    | 20.3%  |    | 9     | 22.0% |          |
|                                             | Broad                              |     | 12    | 12.0% |    | 3     | 5.1%   |    | 9     | 22.0% |          |
| Nasal tip, abnormal                         |                                    | 129 |       |       | 76 |       |        | 53 |       |       | 0.002 *  |
|                                             | Broad                              |     | 75    | 58.1% |    | 47    | 61.8%  |    | 28    | 52.8% |          |
|                                             | Uprturned (anteverted nares)       |     | 38    | 29.5% |    | 30    | 39.5%  |    | 8     | 15.1% |          |
| Nose, abnormal                              |                                    | 83  | 39    | 47.0% | 43 | 23    | 53.5%  | 40 | 16    | 40.0% | 0.022 *  |
|                                             | Short                              |     | 22    | 26.5% |    | 17    | 39.5%  |    | 5     | 12.5% |          |
|                                             | Long                               |     | 17    | 20.5% |    | 6     | 14.0%  |    | 11    | 27.5% |          |
| Alae nasi, thick                            |                                    | 107 | 59    | 55.1% | 69 | 46    | 66.7%  | 38 | 13    | 34.2% | 0.001 *  |
| Nasal base, broad                           |                                    | 88  | 43    | 48.9% | 48 | 21    | 43.8%  | 40 | 22    | 55.0% | 0.392 *  |
| Philtrum, abnormal                          |                                    | 109 | 86    | 78.9% | 72 | 62    | 86.1%  | 37 | 24    | 64.9% | 0.001 *  |
|                                             | Short                              |     | 27    | 24.8% |    | 21    | 29.2%  |    | 6     | 16.2% |          |
|                                             | Long                               |     | 48    | 44.0% |    | 35    | 48.6%  |    | 13    | 35.1% |          |
|                                             | Broad                              |     | 38    | 34.9% |    | 32    | 44.4%  |    | 6     | 16.2% |          |
| Mouth, large                                |                                    | 131 | 90    | 68.7% | 75 | 57    | 76.0%  | 56 | 33    | 58.9% | 0.037 *  |
| Upper vermillion, abnormal                  |                                    | 127 | 72    | 56.7% | 75 | 45    | 60.0%  | 52 | 27    | 51.9% | 0.366 *  |
|                                             | Thin                               |     | 45    | 35.4% |    | 34    | 45.3%  |    | 11    | 21.2% |          |
|                                             | Thick                              |     | 27    | 21.3% |    | 11    | 14.7%  |    | 16    | 30.8% |          |
| Lower vermillion, thick                     |                                    | 125 | 87    | 69.6% | 76 | 60    | 78.9%  | 49 | 27    | 55.1% | 0.005 *  |
| Lower lip, drooping                         |                                    | 71  | 40    | 56.3% | 30 | 23    | 76.7%  | 41 | 17    | 41.5% | 0.004 *  |
| Cleft palate/submucous cleft                |                                    | 90  | 6     | 6.7%  | 35 | 5     | 14.3%  | 55 | 1     | 1.8%  | 0.031 *  |
|                                             | Cleft palate                       |     | 2     | 2.2%  |    | 2     | 5.7%   |    | 0     | 0.0%  |          |
|                                             | Cleft uvula                        |     | 1     | 1.1%  |    | 1     | 2.9%   |    | 0     | 0.0%  |          |
|                                             | Bifid uvula                        |     | 2     | 2.2%  |    | 2     | 5.7%   |    | 0     | 0.0%  |          |
|                                             | Submucous cleft                    |     | 3     | 3.3%  |    | 2     | 5.7%   |    | 1     | 1.8%  |          |
| High arched palate                          |                                    | 85  | 14    | 16.5% | 31 | 7     | 22.6%  | 54 | 7     | 13.0% | 0.250 *  |
| Ears, abnormal                              |                                    | 122 | 64    | 52.5% | 66 | 38    | 57.6%  | 56 | 26    | 46.4% | 0.433 *  |
|                                             | Low-set                            |     | 12    | 9.8%  |    | 9     | 13.6%  |    | 3     | 5.4%  |          |
|                                             | Posterior rotated                  |     | 9     | 7.4%  |    | 6     | 9.1%   |    | 3     | 5.4%  |          |
| Hypertrichosis                              |                                    | 128 | 111   | 86.7% | 76 | 72    | 94.7%  | 52 | 39    | 75.0% | 0.001 *  |
| <i>Musculoskeletal anomalies</i>            |                                    |     |       |       |    |       |        |    |       |       |          |
| Scoliosis                                   |                                    | 123 | 32    | 26.0% | 70 | 19    | 27.1%  | 53 | 13    | 24.5% | 0.743 *  |
| Pectus, excavatum                           |                                    | 104 | 14    | 13.5% | 57 | 8     | 14.0%  | 47 | 6     | 12.8% | 0.850 *  |
| Primary dentition, delayed                  |                                    | 65  | 29    | 44.6% | 40 | 20    | 50.0%  | 25 | 9     | 36.0% | 0.313 *  |
| Permanent dentition, delayed                |                                    | 33  | 16    | 48.5% | 18 | 6     | 33.3%  | 15 | 10    | 66.7% | 0.056 *  |
| Widely spaced teeth                         |                                    | 72  | 30    | 41.7% | 40 | 16    | 40.0%  | 32 | 14    | 43.8% | 0.748 *  |
| Bone age, delayed                           |                                    | 40  | 19    | 47.5% | 30 | 14    | 46.7%  | 10 | 5     | 50.0% | 1.000 ** |
| Joint laxity                                |                                    | 88  | 53    | 60.2% | 52 | 32    | 61.5%  | 36 | 21    | 58.3% | 0.763 *  |
| Early arthritis                             |                                    | 75  | 4     | 5.3%  | 36 | 2     | 5.6%   | 39 | 2     | 5.1%  | 1.000 ** |
| Clinodactyly                                |                                    | 77  | 28    | 36.4% | 42 | 19    | 45.2%  | 35 | 9     | 25.7% | 0.076 *  |
| Short phalanges                             |                                    | 49  | 17    | 34.7% | 34 | 14    | 41.2%  | 15 | 3     | 20.0% | 0.151 *  |
| Complete absent or small 5th distal phalanx |                                    | 110 | 44    | 40.0% | 66 | 40    | 60.6%  | 44 | 4     | 9.1%  | 0.000 ** |
| Prominent distal phalanges;                 |                                    | 102 | 25    | 24.5% | 64 | 20    | 31.3%  | 38 | 5     | 13.2% | 0.040 *  |
| Prominent interphalangeal joints;           |                                    | 103 | 22    | 21.4% | 64 | 18    | 28.1%  | 39 | 4     | 10.3% | 0.032 *  |
| Brachydactyly general                       |                                    | 60  | 10    | 16.7% | 19 | 3     | 15.8%  | 41 | 7     | 17.1% | 1.000 ** |
| Brachydactyly fifth finger                  |                                    | 68  | 21    | 30.9% | 22 | 11    | 50.0%  | 46 | 10    | 21.7% | 0.018 *  |
| Small nails                                 |                                    | 122 | 67    | 54.9% | 73 | 50    | 68.5%  | 49 | 17    | 34.7% | 0.000 *  |
|                                             | Which nails, 5th finger and/or toe | 106 | 59    | 55.7% | 67 | 44    | 65.7%  | 39 | 15    | 38.5% | 0.007 *  |
|                                             | Which nails, all                   | 53  | 6     | 11.3% | 29 | 6     | 20.7%  | 24 | 0     | 0.0%  | 0.027 ** |
| Fetal finger pads                           |                                    | 100 | 29    | 29.0% | 50 | 13    | 26.0%  | 50 | 16    | 32.0% | 0.509 *  |
| <i>Intestinal</i>                           |                                    |     |       |       |    |       |        |    |       |       |          |
| Inguinal hernia                             |                                    | 90  | 7     | 7.8%  | 46 | 1     | 2.2%   | 44 | 6     | 13.6% | 0.056 ** |
| Intestinal problems                         |                                    | 105 | 51    | 48.6% | 60 | 22    | 36.7%  | 45 | 29    | 64.4% | 0.000 *  |
|                                             | Constipation                       |     | 32    | 30.5% |    | 13    | 21.7%  |    | 19    | 42.2% |          |
|                                             | Gastroesophageal reflux            |     | 18    | 17.1% |    | 8     | 13.3%  |    | 10    | 22.2% |          |
|                                             | Diarrhea                           |     | 5     | 4.8%  |    | 2     | 3.3%   |    | 3     | 6.7%  |          |
|                                             | Pyloric Stenosis                   |     | 3     | 2.9%  |    | 3     | 5.0%   |    | 0     | 0.0%  |          |
|                                             | Umbilical hernia                   |     | 5     | 4.8%  |    | 1     | 1.7%   |    | 4     | 8.9%  |          |
| <i>Cardiac &amp; renal anomalies</i>        |                                    |     |       |       |    |       |        |    |       |       |          |
| Cardiac anomalies                           |                                    | 113 | 22    | 19.5% | 69 | 15    | 21.7%  | 44 | 7     | 15.9% | 0.492 *  |
|                                             | ASD                                |     | 12    | 10.6% |    | 9     | 13.0%  |    | 3     | 6.8%  |          |
|                                             | VSD                                |     | 6     | 5.3%  |    | 4     | 5.8%   |    | 2     | 4.5%  |          |



|                                                  |                          |     |      |       |      |      |          |    |      |          |          |
|--------------------------------------------------|--------------------------|-----|------|-------|------|------|----------|----|------|----------|----------|
|                                                  | AVSD                     | 1   | 0.9% | 1     | 1.4% | 0    | 0.0%     |    |      |          |          |
|                                                  | Abnormal aortic arch     | 3   | 2.7% | 1     | 1.4% | 2    | 4.5%     |    |      |          |          |
|                                                  | Aortic valve abnormality | 3   | 2.7% | 2     | 2.9% | 1    | 2.3%     |    |      |          |          |
|                                                  | Mitralis insufficiency   | 3   | 2.7% | 3     | 4.3% | 0    | 0.0%     |    |      |          |          |
|                                                  | Tricuspid insufficiency  | 1   | 0.9% | 0     | 0.0% | 1    | 2.3%     |    |      |          |          |
|                                                  | AV-block                 | 1   | 0.9% | 1     | 1.4% | 0    | 0.0%     |    |      |          |          |
|                                                  | Patent ductus arteriosus | 1   | 0.9% | 0     | 0.0% | 1    | 2.3%     |    |      |          |          |
|                                                  | Patent foramen ovale     | 1   | 0.9% | 1     | 1.4% | 0    | 0.0%     |    |      |          |          |
|                                                  | Enlarged right venticle  | 1   | 0.9% | 1     | 1.4% | 0    | 0.0%     |    |      |          |          |
| Renal anomalies                                  |                          | 95  | 12   | 12.6% | 53   | 6    | 11.3%    | 42 | 6    | 14.3%    | 0.666 ** |
|                                                  | Hydronephrotic kidney    |     | 3    | 3.2%  |      | 1    | 1.9%     |    | 2    | 4.8%     |          |
|                                                  | Unilateral ptosis kidney |     | 1    | 1.1%  |      | 0    | 0.0%     |    | 1    | 2.4%     |          |
|                                                  | Renal failure - Grade IV |     | 1    | 1.1%  |      | 0    | 0.0%     |    | 1    | 2.4%     |          |
|                                                  | Nephrolithiasis          |     | 3    | 3.2%  |      | 2    | 3.8%     |    | 1    | 2.4%     |          |
| Secondary left-sided reflux; left atropic kidney |                          |     | 1    | 1.1%  |      | 0    | 0.0%     |    | 1    | 2.4%     |          |
|                                                  | Renal abscesses          |     | 1    | 1.1%  |      | 1    | 1.9%     |    | 0    | 0.0%     |          |
| Renal sonography, abnormal                       |                          | 43  | 11   | 25.6% | 19   | 4    | 21.1%    | 24 | 7    | 29.2%    | 0.105 ** |
|                                                  | Grade 1 increased echo   |     | 1    |       |      | 0    |          |    | 1    |          |          |
|                                                  | Dilated right pyelum     |     | 1    |       |      | 0    |          |    | 1    |          |          |
| Cryptorchidism                                   |                          | 65  | 36   | 55.4% | 28   | 11   | 39.3%    | 37 | 25   | 67.6%    | 0.023 *  |
| Endocrinological abnormalities++                 |                          |     |      |       |      |      |          |    |      |          |          |
| Diabetes mellitus                                |                          | 71  | 5    | 7.0%  | 43   | 3    | 7.0%     | 28 | 2    | 7.1%     | 1.000 ** |
| Type 2 diabetes mellitus                         |                          | 4   | 3    | 75.0% | 2    | 2    | 100.0%   | 2  | 1    | 50.0%    | 1.000 ** |
| Age (years) diagnosis (nr, median, min-max)      |                          | 2   | 32   | 18,46 | 1    | 18.0 | 18.0     | 1  | 46.0 | 46.0     | 0.317 #  |
| Hypothyroidism                                   |                          | 63  | 12   | 19.0% | 38   | 6    | 15.8%    | 25 | 6    | 24.0%    | 0.417 *  |
| Age (years) diagnosis (nr, median, min-max)      |                          | 10  | 8    | 1-40  | 4    | 2.5  | 1.3-36.0 | 6  | 12.5 | 1.0-40.0 | 0.394 #  |
| Growth hormone deficiency                        |                          | 51  | 7    | 13.7% | 33   | 6    | 18.2%    | 18 | 1    | 5.6%     | 0.398 ** |
| Growth hormone supplementation                   |                          | 50  | 6    | 12.0% | 31   | 5    | 16.1%    | 19 | 1    | 5.3%     | 0.387 ** |
| Behavioral abnormalities                         |                          | 71  | 59   | 83.1% | 28   | 24   | 85.7%    | 43 | 35   | 81.4%    | 0.945 *  |
|                                                  | Hyperkinetic             |     | 11   | 15.5% |      | 4    | 14.3%    |    | 7    | 16.3%    |          |
|                                                  | Short attention          |     | 18   | 25.4% |      | 7    | 25.0%    |    | 11   | 25.6%    |          |
|                                                  | Impulsiveness            |     | 10   | 14.1% |      | 4    | 14.3%    |    | 6    | 14.0%    |          |
|                                                  | Obsessive                |     | 11   | 15.5% |      | 4    | 14.3%    |    | 7    | 16.3%    |          |
|                                                  | Rigid                    |     | 6    | 8.5%  |      | 1    | 3.6%     |    | 5    | 11.6%    |          |
|                                                  | Anger outbursts          |     | 12   | 16.9% |      | 3    | 10.7%    |    | 9    | 20.9%    |          |
|                                                  | Aggressive               |     | 12   | 16.9% |      | 4    | 14.3%    |    | 8    | 18.6%    |          |
|                                                  | Anxious                  |     | 17   | 23.9% |      | 5    | 17.9%    |    | 12   | 27.9%    |          |
|                                                  | Poor sociability         |     | 14   | 19.7% |      | 5    | 17.9%    |    | 9    | 20.9%    |          |
| Hyperactivity                                    |                          | 63  | 27   | 42.9% | 25   | 15   | 60.0%    | 38 | 12   | 31.6%    | 0.026 *  |
| High pain threshold++                            |                          | 47  | 19   | 40.4% | 28   | 8    | 28.6%    | 19 | 11   | 57.9%    | 0.044 *  |
| Psychiatric disorders                            |                          |     |      |       |      |      |          |    |      |          |          |
| ADHD                                             |                          | 48  | 16   | 33.3% | 16   | 8    | 50.0%    | 32 | 8    | 25.0%    | 0.083 *  |
| Autistic traits                                  |                          | 77  | 44   | 57.1% | 27   | 18   | 66.7%    | 50 | 26   | 52.0%    | 0.215 *  |
| Malignancies                                     |                          | 97  | 1    | 1.0%  | 53   | 0    | 0.0%     | 44 | 1    | 2.3%     | 0.454 ** |
| Technique                                        |                          | 143 |      |       | 79   |      |          | 64 |      |          | 0.000 ** |
|                                                  | Sanger sequencing        |     | 16   | 11.2% |      | 7    | 8.9%     |    | 9    | 14.1%    |          |
|                                                  | Whole exome sequencing   |     | 43   | 30.1% |      | 5    | 6.3%     |    | 38   | 59.4%    |          |
|                                                  | Targeted NGS < 10 genes  |     | 60   | 42.0% |      | 60   | 75.9%    |    | 0    | 0.0%     |          |
|                                                  | Targeted NGS < 100 genes |     | 4    | 2.8%  |      | 1    | 1.3%     |    | 3    | 4.7%     |          |
|                                                  | Targeted NGS > 100 genes |     | 7    | 4.9%  |      | 2    | 2.5%     |    | 5    | 7.8%     |          |
| Genome-wide CNV analysis e.g. microarray         |                          |     | 13   | 9.1%  |      | 4    | 5.1%     |    | 9    | 14.1%    |          |

\* Chi-square, \*\* Fisher's, # Mann-Whitney U

+ the total number of a feature can differ from the sum of subcategories, because in some cases it was possible to answer with more than 1 option or to report the existence of a feature without specifying.

++ data regarding these features were collected through e-mail after first analyses

#### Abbreviations

ARID1B-CSS: patient group with a suspicion of Coffin-Siris Syndrome before genetic testing  
ARID1B-ID: patient group with no suspicion of Coffin-Siris Syndrome before genetic testing  
CSS: Coffin-Siris Syndrome  
SDS: Standard Deviation Score  
OFC: OccipitoFrontal Circumference  
SD: Standard Deviation  
ENT: Ear Nose Throat  
EEG: ElectroEncephaloGraphy  
ASD: Atrial Septal Defect  
VSD: Ventricular Septal Defect  
AV-Block: AtrioVentricular Block  
AVSD: AtrioVentricular Septal Defect  
NGS: Next Generation Sequencing  
CNV: Copy Number Variation  
ADHD: Attention Deficit Hyperactivity Disorder

**Table S3: Suspected diagnoses\* before genetic testing**

| <i>n</i> =60                   | Fits CSS spectrum? |    |         | Total |
|--------------------------------|--------------------|----|---------|-------|
|                                | Yes                | No | Unknown |       |
| Non-syndromic ID               | 8                  | 3  | 2       | 13    |
| Syndromic ID**                 | 34                 | 1  | 1       | 36    |
| Multiple congenital anomalies  | 3                  | 1  | 0       | 4     |
| Developmental delay            | 4                  | 0  | 0       | 4     |
| Neurofibromatosis              | 0                  | 0  | 1       | 1     |
| Autism spectrum disorder       | 3                  | 0  | 2       | 5     |
| Rasopathy                      | 0                  | 1  | 0       | 1     |
| Trichothiodystrophy            | 1                  | 0  | 0       | 1     |
| Mucopolysaccharidosis          | 2                  | 0  | 0       | 2     |
| Mucopolidosis                  | 1                  | 0  | 0       | 1     |
| No diagnosis reported a priori | 4                  | 0  | 0       | 4     |
| Total                          | 53                 | 6  | 5       | 64    |

**\*\*Syndromic ID specified**

| <i>n</i> =36                       | Fits CSS spectrum? |    |         | Total |
|------------------------------------|--------------------|----|---------|-------|
|                                    | Yes                | No | Unknown |       |
| Nicolaides-Baraitser syndrome      | 4                  | 0  | 0       | 4     |
| Pitt Hopkins                       | 2                  | 0  | 0       | 2     |
| Costello syndrome                  | 2                  | 0  | 0       | 2     |
| Coffin-Lowry syndrome              | 2                  | 0  | 0       | 2     |
| Pierpont syndrome                  | 1                  | 0  | 0       | 1     |
| Rubinstein-Taybi syndrome          | 0                  | 0  | 1       | 1     |
| Borjeson-Forssman-Lehmann syndrome | 0                  | 1  | 0       | 1     |
| Wiedemann-Steiner syndrome         | 1                  | 0  | 0       | 1     |
| Not specified                      | 23                 | 0  | 0       | 23    |
| Total                              | 34                 | 1  | 1       | 36    |

*\*More suspected diagnoses possible per patient*

**Table S4: Results ‘open-ended’ questions. Except for growth hormone deficiency only features reported  $\geq 3$  times were shown.**

| Reported features                 | Results open-ended questions | Results additional data request |             |     |
|-----------------------------------|------------------------------|---------------------------------|-------------|-----|
|                                   | Frequency                    | <i>n</i> = 95                   | pt affected | %   |
| Laryngomalacia                    | 12                           | 91                              | 18          | 20% |
| Hyperhidrosis(excessive sweating) | 8                            | -                               | -           | -   |
| Pes planus/ flatfoot              | 7                            | -                               | -           | -   |
| Hypothyroidism                    | 6                            | 63                              | 12          | 19% |
| Diabetes                          | 4                            | 71                              | 5           | 7%  |
| Obstructive sleep apnoea          | 4                            | 71                              | 6           | 8%  |
| Excessive salivation/drooling     | 4                            | -                               | -           | -   |
| Sleep problems/fatigue            | 4                            | -                               | -           | -   |
| High pain threshold               | 3                            | 47                              | 19          | 40% |
| High arched eyebrows              | 3                            | -                               | -           | -   |
| Prognathia                        | 3                            | -                               | -           | -   |
| Deep palmar creases of the hands  | 3                            | -                               | -           | -   |
| Thin nails (not small)            | 3                            | -                               | -           | -   |
| Growth hormone deficiency         | 2                            | 51                              | 7           | 14% |
| Growth hormone supplementation    | 1                            | 50                              | 6           | 12% |

**Table S5: gnomAD, LoF mutations in transcript ENST00000346085 (NM\_020732.3)**<http://gnomad.broadinstitute.org/transcript/ENST00000346085>

| Exon | Transcript Consequence | Location gdna                | Predicted protein change | Allele Count | Interpretation                               |
|------|------------------------|------------------------------|--------------------------|--------------|----------------------------------------------|
| 1    | c.362_363insGC         | g.156778291_156778292insGC   | p.Gln122Hisfs*59         | 39           | Begin exon 1 in low complexity regions (LCR) |
| 1    | c.363_364insG          | g.156778292_156778293insG    | p.Gln122Alafs*110        | 6            | Begin exon 1, in LCR                         |
| 1    | c.363_364insGCAG       | g.156778292_156778293insGCAG | p.Gln122Alafs*111        | 4            | Begin exon 1, in LCR                         |
| 3    | c.1738-1G>A            | g.156871613G>A               | r.spl?                   | 1            | Exon 3                                       |
| 3    | c.1762G>T              | g.156871638G>T               | p.Glu588*                | 4            | Exon 3                                       |
| 5    | c.1927-2A>G            | g.156935464A>G               | r.spl?                   | 1            | Likely pathogenic                            |
| 11   | c.3026-1G>A            | g.157174007G>A               | r.spl?                   | 3            | Likely pathogenic                            |
| 12   | c.3345+2T>C            | g.157181180T>C               | r.spl?                   | 1            | Likely pathogenic                            |
| 15   | c.3780_3817del         | g.157190128_157190165del     | p.Gln1261Alafs*3         | 1            | Likely pathogenic                            |
| 20   | c.6013delG             | g.157207154del               | p.Val2005Trpfs*16        | 1            | Likely pathogenic                            |

**Table S6: Data DECIPHER database compared with data [www.arid1bgene.com](http://www.arid1bgene.com)**

| Reported (HPO-)feature                                  | DECIPHER (n=54) |      |          | ARID1Bgene.com (n=143) |             |      |           | Reported feature            |
|---------------------------------------------------------|-----------------|------|----------|------------------------|-------------|------|-----------|-----------------------------|
|                                                         | pt affected     | %    | p-value* | n                      | pt affected | %    | p-value** |                             |
| Intellectual disability                                 | 11              | 20.4 | -        | 127                    | 126         | 99.2 | <0.001    | Cognition delay             |
| Morphological abnormality of the gastrointestinal tract | 12              | 22.2 | +        | 105                    | 51          | 48.6 | 0.001     | Intestinal problems         |
| Agenesis of corpus callosum                             | 10              | 18.5 | +        | 101                    | 43          | 42.6 | 0.003     | Agenesis of corpus callosum |
| Muscular hypotonia                                      | 9               | 16.7 | -        | 116                    | 94          | 81.0 | <0.001    | Hypotonia                   |
| Hypertrichosis                                          | 8               | 14.8 | +        | 128                    | 111         | 86.7 | <0.001    | Hypertrichosis              |
| Short stature                                           | 8               | 14.8 | -        | 122                    | 37          | 30.3 | 0.030     | Height < -2 SDS             |
| Laryngomalacia                                          | 7               | 13.0 | +        | 91                     | 18          | 19.8 | 0.293     | Laryngomalacia++            |
| Abnormality of the testis                               | 7               | 13.0 | +        | 65                     | 36          | 55.4 | <0.001    | Cryptorchidism              |
| Absent speech                                           | 4               | 7.4  | -        | 131                    | 42          | 32.1 | <0.001    | No speech                   |
| Expressive language delay                               | 4               | 7.4  | -        | 131                    | 128         | 97.7 | <0.001    | Speech delay                |
| Myopia                                                  | 4               | 7.4  | -        | 102                    | 28          | 27.5 | 0.003     | Myopia                      |
| Abnormality of the cardiac septa                        | 3               | 5.6  | -        | 106                    | 16          | 15.1 | 0.078     | VSD/ASD/AVSD                |
| Abnormality of the kidney                               | 2               | 3.7  | -        | 95                     | 12          | 12.6 | 0.073     | Renal anomalies             |
| Seizures                                                | 3               | 5.6  | -        | 142                    | 39          | 27.5 | 0.001     | Seizures                    |

\*p-value based on frequency of the reported feature in other phenotyped patients in DECIPHER; '+' is a p-value < 0.05/247

\*\* p-value compared to frequency in DECIPHER cohort

\*\*\*no question was included

++ data collected through e-mail after first analyses

**Figure S1. Photographs of two patients with ARID1B-CSS and two patients with ARID1B-ID.**

Relatively coarse facial features can be seen in these patients, and most have full lips. Typical sparse hair is seen in patient 142. The extremities show short fifth digit in patient 1, hypoplastic fifth finger nail in patient 37, hypoplastic nail of the fifth toe of patient 132, and normal nails in patient 142. Overall the characteristics represent a spectrum with patients with ARID1B-CSS and ARID1B-ID having overlapping features.

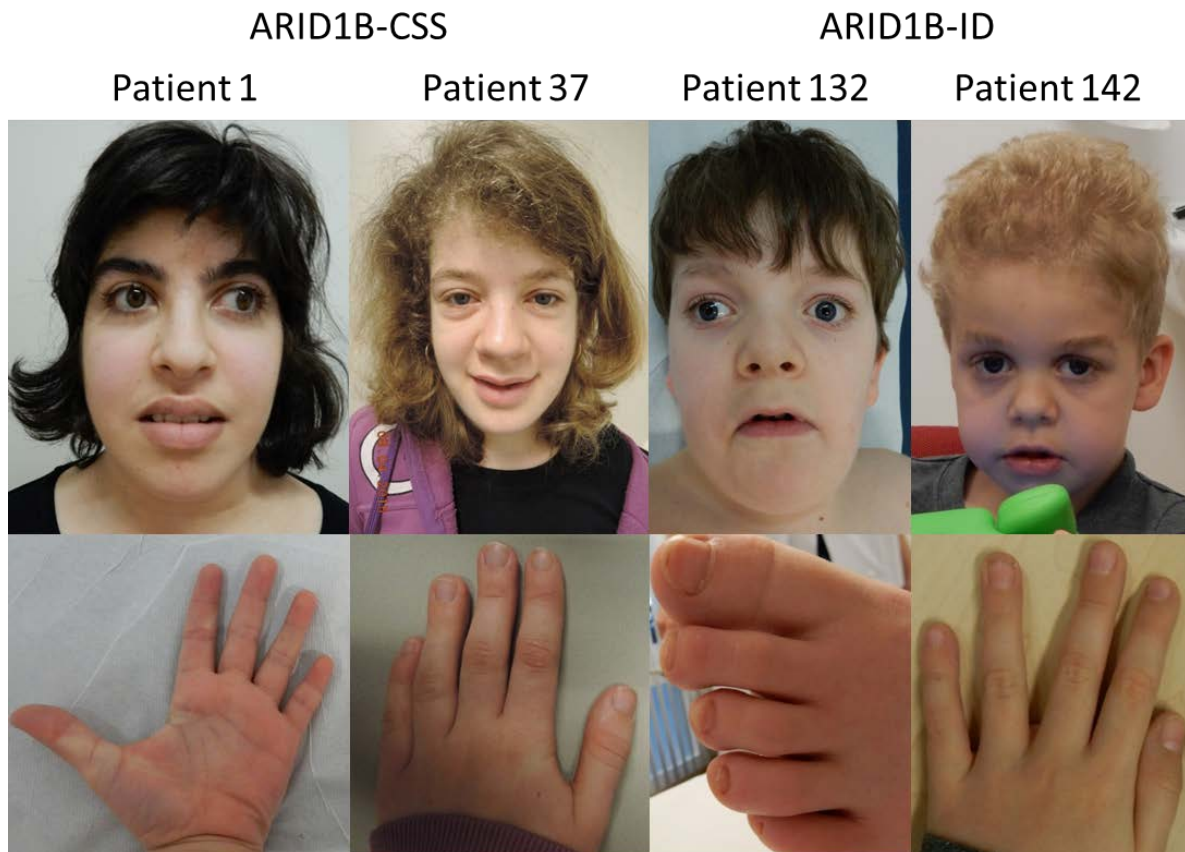

**Figure S2: Degree of intellectual disability and mutation position**

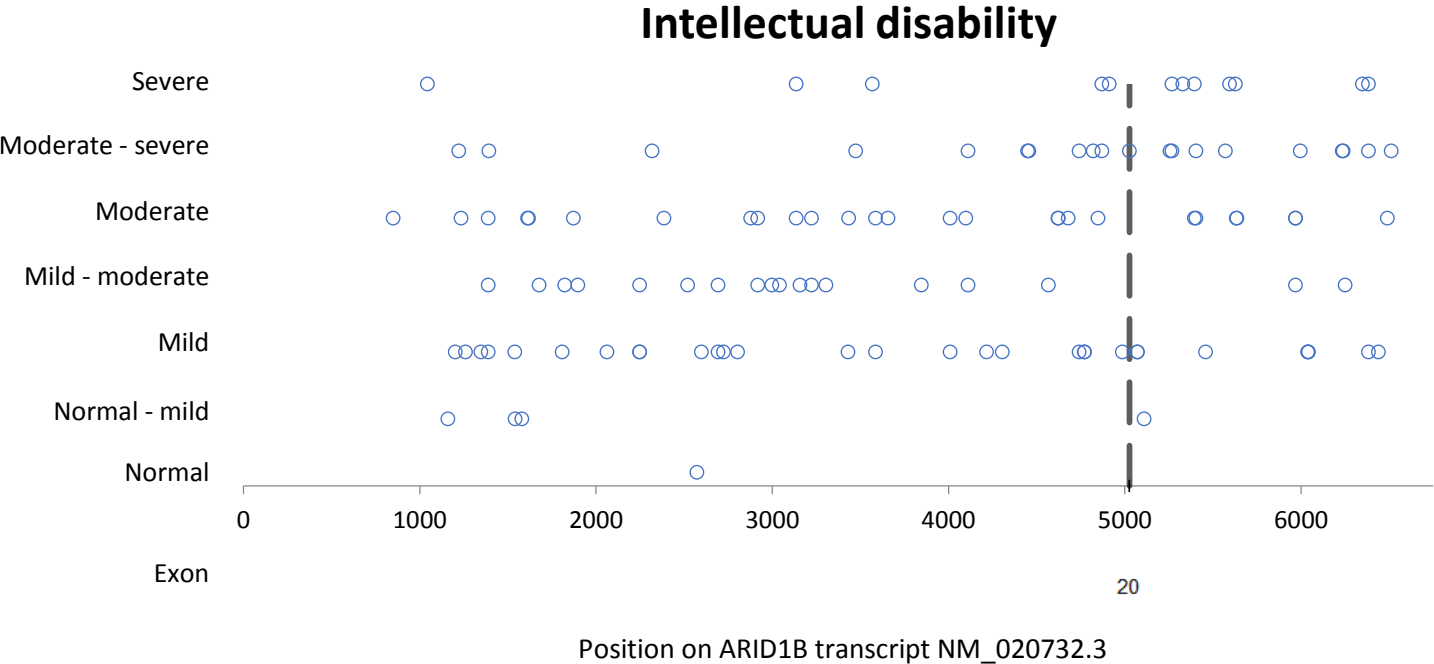

Figure S3: Data DECIPHER database compared with data [www.arid1bgene.com](http://www.arid1bgene.com)

### Occipital Head Circumference

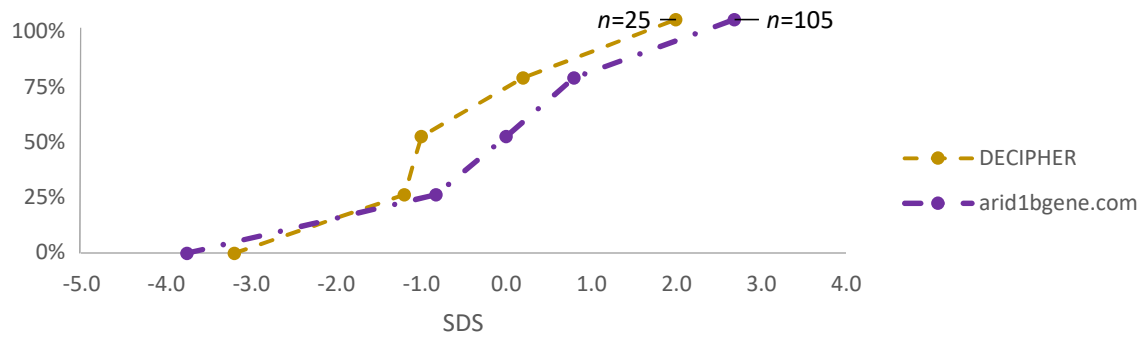

### Height

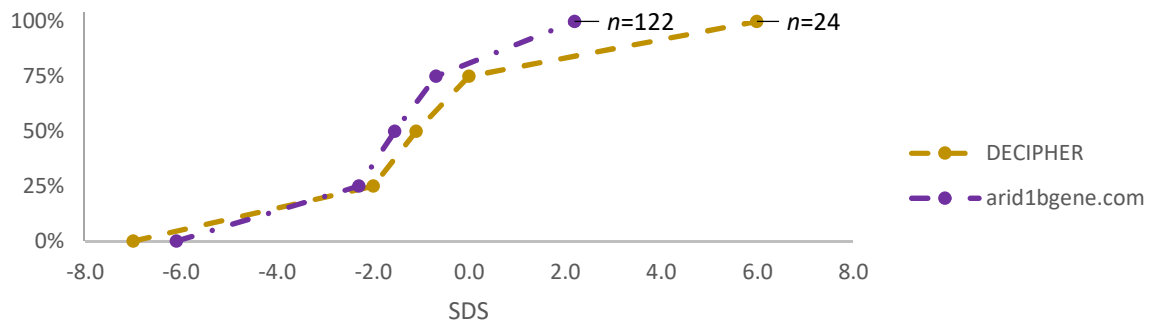

### Sat unaided

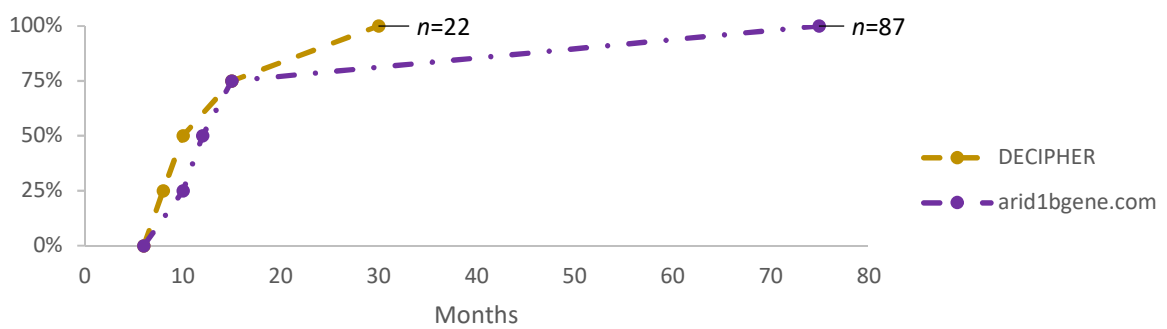



## Walking unaided

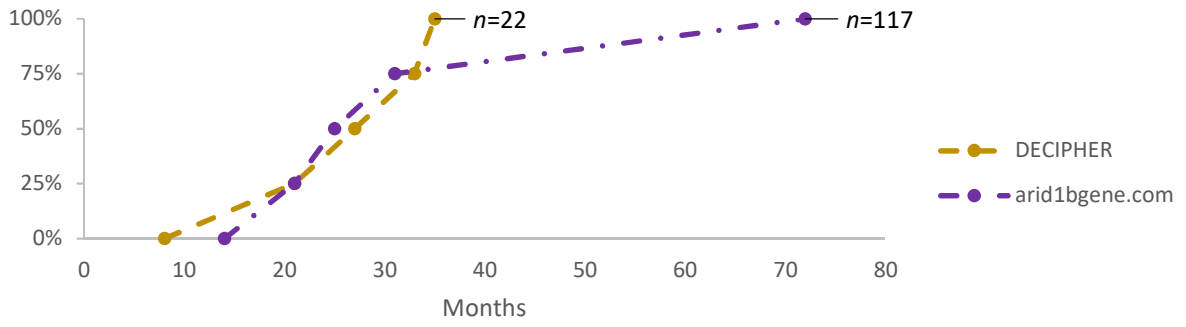

## First words

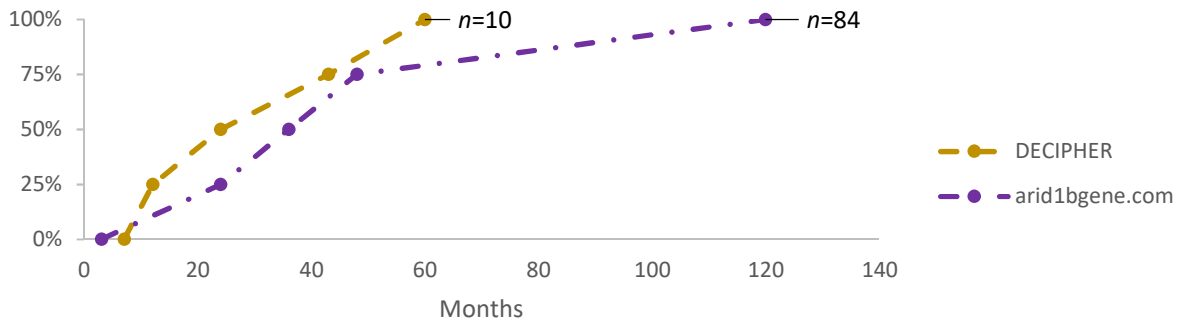

Supplement: 41436_2018_330_MOESM1_ESM.pdf [file 41436_2018_330_MOESM1_ESM.pdf]
